# Supplementary material for: de novo assembly and population genomic survey of natural yeast isolates with the Oxford Nanopore MinION sequencer
Source: PubMed Central journal article supplement (PMC5466710; doi:10.1093/gigascience/giw018), 2017-01-07
Supplement: giw018_Response_to_Reviewer_Comments_Revision_1.pdf [file giw018_Response_to_Reviewer_Comments_Revision_1.pdf]

Edits made addressing final comments and DOI integrated.
